# Supplementary material for: Bacteriophage-Based Detection of Staphylococcus aureus in Human Serum
Source: MDPI journal article supplement (doi:10.3390/v14081748), 2022-08-10
Supplement: s1 [file s1]

**Table S1.** Loss of Assay Signal in Human Serum: RLU and CFU Values for Figure 1a and Figure 1b

|                |                 | Signal (RLU)                                 |        |        |                  |        |        |
|----------------|-----------------|----------------------------------------------|--------|--------|------------------|--------|--------|
| Serum Source   | Serum Conc. (%) | <i>S. aureus</i> (111 CFU/Well) <sup>1</sup> |        |        | Media Background |        |        |
|                |                 | Well 1                                       | Well 2 | Well 3 | Well 1           | Well 2 | Well 3 |
| Off-the-clot   | 0               | 620200                                       | 661700 | 467400 | 251              | 206    | 206    |
|                | 0.01            | 298800                                       | 430600 | 250600 | 212              | 222    | 212    |
|                | 0.1             | 1210                                         | 3802   | 1592   | 227              | 237    | 220    |
|                | 1               | 327                                          | 361    | 358    | 346              | 357    | 305    |
|                | 5               | 637                                          | 622    | 672    | 605              | 650    | 618    |
|                | 10              | 870                                          | 867    | 857    | 883              | 911    | 748    |
|                | 25              | 966                                          | 997    | 1055   | 1065             | 1098   | 1051   |
|                | 50              | 1101                                         | 1070   | 1161   | 1156             | 1185   | 1178   |
| Plasma-derived | 0               | 648500                                       | 606700 | 985900 | 198              | 203    | 176    |
|                | 0.01            | 437200                                       | 206200 | 552100 | 238              | 245    | 220    |
|                | 0.1             | 8706                                         | 8481   | 9509   | 238              | 221    | 221    |
|                | 1               | 371                                          | 397    | 353    | 326              | 278    | 293    |
|                | 5               | 553                                          | 581    | 637    | 531              | 586    | 516    |
|                | 10              | 765                                          | 768    | 746    | 731              | 810    | 775    |
|                | 25              | 905                                          | 896    | 905    | 972              | 957    | 883    |
|                | 50              | 890                                          | 991    | 938    | 1018             | 983    | 955    |

<sup>1</sup> CFU per well for *S. aureus* strain ATCC 12600 was determined by colony counting and is the average of triplicate plates.

**Table S2.** Influence of Bacterial Burden on Serum Inhibition: RLU and CFU Values for Figure 1c

| <i>S. aureus</i> (CFU/well) <sup>1</sup> | Signal (RLU) |          |          |          |         |         |           |        |        |
|------------------------------------------|--------------|----------|----------|----------|---------|---------|-----------|--------|--------|
|                                          | 0% Serum     |          |          | 1% Serum |         |         | 10% Serum |        |        |
|                                          | Well 1       | Well 2   | Well 3   | Well 1   | Well 2  | Well 3  | Well 1    | Well 2 | Well 3 |
| 0                                        | 163          | 181      | 181      | 286      | 263     | 275     | 707       | 742    | 705    |
| 85                                       | 244400       | 195200   | 272100   | 275      | 310     | 266     | 727       | 728    | 691    |
| 850                                      | 3227000      | 2008000  | 3275000  | 378      | 325     | 322     | 651       | 630    | 726    |
| 8500                                     | 21890000     | 15160000 | 18840000 | 1033     | 702     | 1195    | 526       | 523    | 528    |
| 85000                                    | 60310000     | 76480000 | 62170000 | 20660    | 16670   | 9813    | 443       | 786    | 538    |
| 850000                                   | 69320000     | 77460000 | 67000000 | 92490    | 110800  | 56520   | 18230     | 50730  | 60620  |
| 8500000                                  | 19750000     | 14370000 | 18950000 | 3048000  | 3445000 | 3942000 | 286000    | 248900 | 404300 |

<sup>1</sup> CFU per well for *S. aureus* strain ATCC 12600 was measured by colony counting and is the average of triplicate plates. This was only directly performed for the 85 CFU/well burden. Other samples were indirectly extrapolated based upon a serial ten-fold dilution scheme using this burden.

**Table S3.** Signal Inhibition by Serum is Common Across *S. aureus* Strains: RLU and CFU Values for Figure 2

| Sample Type        | ATCC Strain ID | CFU/well <sup>1</sup> | Signal (RLU) |         |         |          |        |        |
|--------------------|----------------|-----------------------|--------------|---------|---------|----------|--------|--------|
|                    |                |                       | 0% Serum     |         |         | 1% Serum |        |        |
|                    |                |                       | Well 1       | Well 2  | Well 3  | Well 1   | Well 2 | Well 3 |
| MSSA               | 6538           | 19                    | 397700       | 371500  | 515000  | 172500   | 120600 | 499200 |
|                    | 12600          | 88                    | 1068000      | 865800  | 1203000 | 391      | 495    | 361    |
|                    | 14775          | 107                   | 4084000      | 3132000 | 3205000 | 672      | 711    | 965    |
|                    | 25923          | 18                    | 1100000      | 1123000 | 1058000 | 3642     | 9474   | 23030  |
|                    | 29213          | 69                    | 252400       | 320800  | 316800  | 3798     | 5267   | 3938   |
| MRSA               | 33592          | 99                    | 24900        | 47090   | 43940   | 471      | 758    | 557    |
|                    | BAA-1683       | 60                    | 254000       | 145900  | 350600  | 4013     | 515    | 2385   |
|                    | BAA-1707       | 79                    | 1613000      | 1011000 | 2064000 | 3926     | 2291   | 3020   |
|                    | BAA-1717       | 83                    | 764800       | 1059000 | 1111000 | 425      | 413    | 431    |
|                    | BAA-1720       | 111                   | 583600       | 600400  | 583400  | 28270    | 3846   | 11660  |
|                    | BAA-1747       | 74                    | 117300       | 117400  | 92810   | 502      | 777    | 620    |
|                    | BAA-1754       | 109                   | 1498000      | 1008000 | 965800  | 238400   | 593700 | 169000 |
|                    | BAA-1761       | 63                    | 551800       | 502000  | 225100  | 412      | 442    | 402    |
|                    | BAA-1763       | 40                    | 52130        | 86690   | 97610   | 376      | 391    | 380    |
|                    | BAA-1764       | 93                    | 1347000      | 1198000 | 1064000 | 1378     | 2698   | 3452   |
|                    | BAA-1766       | 105                   | 718100       | 649900  | 651100  | 475300   | 602600 | 552900 |
|                    | BAA-1768       | 80                    | 3572000      | 4003000 | 3853000 | 42680    | 18450  | 22970  |
|                    | BAA-2094       | 93                    | 2493000      | 1716000 | 2054000 | 4651     | 31510  | 1521   |
|                    | BAA-2313       | 81                    | 4720000      | 2928000 | 1474000 | 56600    | 51620  | 254900 |
|                    | BAA-41         | 51                    | 1255000      | 1341000 | 622600  | 621      | 517    | 372    |
|                    | BAA-42         | 72                    | 21240        | 27900   | 22990   | 1037     | 726    | 596    |
|                    | BAA-44         | 71                    | 230900       | 231100  | 228700  | 40640    | 36570  | 10630  |
| Media <sup>2</sup> | N/A            | N/A                   | 226          | 236     | 217     | 326      | 296    | 533    |
|                    |                |                       | 246          | 245     | 268     | 343      | 345    | 326    |

<sup>1</sup> CFU per well for each *S. aureus* strain was measured by colony counting and is the average of duplicate plates.

<sup>2</sup> Two sets of triplicate media background wells were run. One with the MSSA strains (top) and one with the MRSA strains (bottom).

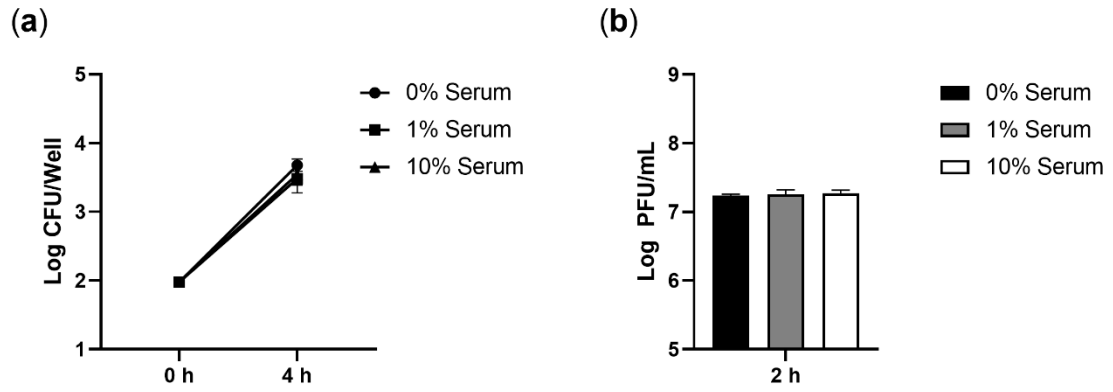

**Figure S1.** Reduction in signal from serum is not associated with reduced bacterial enrichment or loss of phage viability. (a) *S. aureus* strain ATCC 12600 was enriched in the presence of either 0, 1, or 10% human serum. Starting burden (0 h) was approximately 95 CFU per well. Each condition was assayed in triplicate and, following a 4 h enrichment, each well was diluted and spread on duplicate plates to determine CFU. (b) Working stock of the phage cocktail was incubated in either 0, 1, or 10% human serum for 2 h in triplicate wells to mimic the infection period. The approximate starting titer in each well was  $2 \times 10^7$  pfu/mL. Following the 2 h mock infection, samples were diluted and the titer for each well was determined by plaque counting. Error bars in each dataset represent standard deviation. A one-way ANOVA with a Bonferroni's multiple comparisons test was performed, comparing conditions with serum to those without serum. No significant ( $p < 0.05$ ) differences were observed for either Log CFU/well or Log PFU/mL.

**Table S4.** Role of Serum Proteins in Signal Inhibition: RLU and CFU Values for Figure 3a and Figure 3b

| Serum Component | Assay Concentration | Signal (RLU)                                 |        |        |                  |        |        |
|-----------------|---------------------|----------------------------------------------|--------|--------|------------------|--------|--------|
|                 |                     | <i>S. aureus</i> (100 CFU/Well) <sup>1</sup> |        |        | Media Background |        |        |
|                 |                     | Well 1                                       | Well 2 | Well 3 | Well 1           | Well 2 | Well 3 |
| Albumin         | 0 mg/mL             | 555600                                       | 648400 | 422700 | 212              | 226    | 221    |
|                 | 0.004 mg/mL         | 541900                                       | 508100 | 456300 | 242              | 217    | 198    |
|                 | 0.04 mg/mL          | 370300                                       | 315200 | 572200 | 238              | 195    | 232    |
|                 | 0.4 mg/mL           | 511100                                       | 544800 | 449200 | 333              | 312    | 272    |
|                 | 2 mg/mL             | 572100                                       | 881200 | 773700 | 526              | 503    | 480    |
|                 | 4 mg/mL             | 685500                                       | 833000 | 804300 | 601              | 617    | 561    |
|                 | 10 mg/mL            | 432900                                       | 651000 | 730600 | 763              | 743    | 791    |
|                 | 20 mg/mL            | 185200                                       | 389700 | 336000 | 896              | 847    | 851    |
| IgG             | 0 µg/mL             | 485300                                       | 492600 | 468400 | 187              | 213    | 177    |
|                 | 1.7 µg/mL           | 128600                                       | 79450  | 71390  | 211              | 206    | 220    |
|                 | 17 µg/mL            | 1626                                         | 723    | 1306   | 225              | 217    | 178    |
|                 | 168 µg/mL           | 258                                          | 283    | 257    | 196              | 197    | 190    |

<sup>1</sup> CFU per well for *S. aureus* strain ATCC 12600 was measured by colony counting and as an average of triplicate plates.

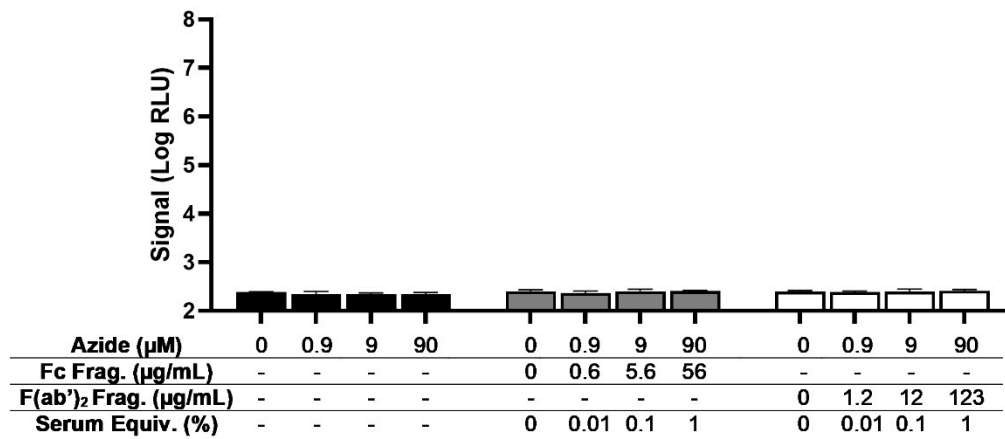

**Figure S2.** Media background from IgG fragments (Figure 3c). Fragments of human IgG were diluted in TSB and matched to an azide buffer control. Luciferase production was evaluated following a 4 h enrichment and a 2 h infection and is provided as log-transformed relative light units (Log RLU). Error bars represent standard deviation from triplicate wells. A two-way ANOVA with a Bonferroni's multiple comparisons test was performed, comparing the concentration of each serum protein to the corresponding media or buffer control. No significant ( $p < 0.05$ ) differences were observed. For comparison, the approximate percentage of serum that each protein concentration is equivalent to is provided (Serum Equiv.).

**Table S5.** Role of Individual IgG Fragments in Signal Inhibition: RLU and CFU Values for Figure 3c and Figure S2

| Serum Component              | Assay Conc. (µg/mL) | Azide Conc. (µM) | Signal (RLU)                                |        |        |                  |        |        |
|------------------------------|---------------------|------------------|---------------------------------------------|--------|--------|------------------|--------|--------|
|                              |                     |                  | <i>S. aureus</i> (96 CFU/Well) <sup>1</sup> |        |        | Media Background |        |        |
|                              |                     |                  | Well 1                                      | Well 2 | Well 3 | Well 1           | Well 2 | Well 3 |
| N/A                          | N/A                 | 0                | 387000                                      | 391600 | 286700 | 248              | 238    | 235    |
|                              |                     | 0.9              | 192700                                      | 251300 | 227500 | 255              | 205    | 205    |
|                              |                     | 9                | 307200                                      | 233600 | 205400 | 232              | 213    | 227    |
|                              |                     | 90               | 316600                                      | 261600 | 168400 | 242              | 216    | 211    |
| Fc Fragment                  | 0                   | 0                | 389200                                      | 259200 | 433700 | 258              | 233    | 265    |
|                              | 0.6                 | 0.9              | 104700                                      | 258100 | 171900 | 253              | 210    | 235    |
|                              | 5.6                 | 9                | 4002                                        | 11700  | 7623   | 248              | 236    | 280    |
|                              | 56                  | 90               | 865                                         | 1676   | 1716   | 258              | 258    | 248    |
| F(ab') <sub>2</sub> Fragment | 0                   | 0                | 504700                                      | 354100 | 292400 | 258              | 250    | 230    |
|                              | 1.2                 | 0.9              | 364900                                      | 345900 | 235600 | 248              | 251    | 227    |
|                              | 12                  | 9                | 361900                                      | 240800 | 223900 | 285              | 233    | 233    |
|                              | 123                 | 90               | 35600                                       | 19930  | 24290  | 248              | 252    | 277    |

<sup>1</sup> CFU per well for *S. aureus* strain ATCC 12600 was measured by colony counting and as an average of triplicate plates.

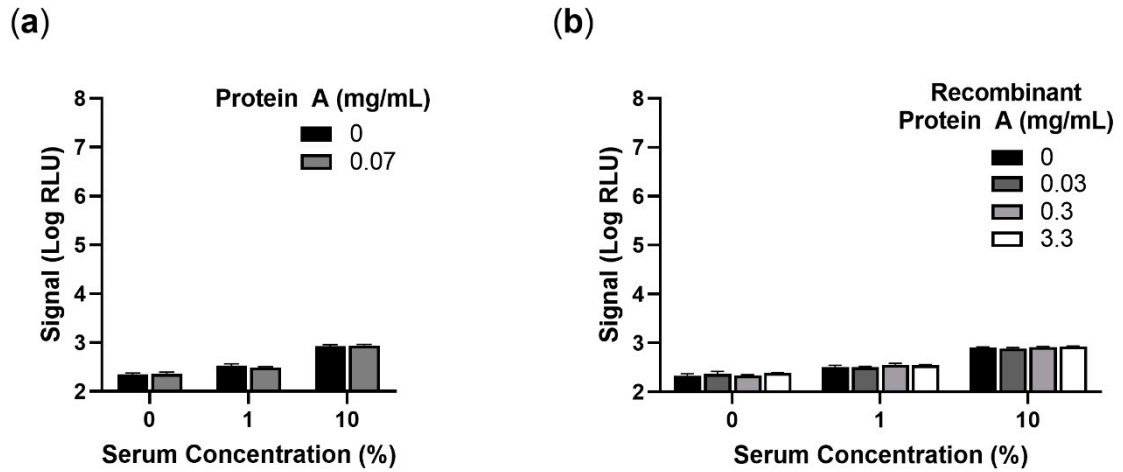

**Figure S3.** Media background from Protein A supplementation (Figure 4). Native protein A from *S. aureus* **(a)**, and recombinant protein A produced in *E. coli* **(b)** were diluted in media (TSB). Assay wells also contained either 0, 1, or 10% off-the-clot human serum. Luciferase production was evaluated following a 4 h enrichment and a 2 h infection and is provided as log-transformed relative light units (Log RLU). Error bars represent standard deviation from triplicate wells. A two-way ANOVA with a Bonferroni's multiple comparisons test was performed, comparing each condition with protein A back to the baseline signal without protein A (0 mg/mL). No significant ( $p < 0.05$ ) differences were observed.



**Table S6.** Protein A Supplementation Alleviates Signal Inhibition: RLU and CFU Values for Figure 4 and Figure S3

| Protein A Type | Protein A Conc. (mg/mL) | Serum % | Signal RLU                    |        |        |                  |        |        |
|----------------|-------------------------|---------|-------------------------------|--------|--------|------------------|--------|--------|
|                |                         |         | <i>S. aureus</i> <sup>1</sup> |        |        | Media Background |        |        |
|                |                         |         | Well 1                        | Well 2 | Well 3 | Well 1           | Well 2 | Well 3 |
| Native         | 0                       | 0       | 193600                        | 315900 | 341100 | 235              | 208    | 228    |
|                |                         | 1       | 387                           | 307    | 352    | 342              | 367    | 300    |
|                |                         | 10      | 846                           | 808    | 822    | 857              | 902    | 790    |
|                | 0.07                    | 0       | 306600                        | 236900 | 262400 | 251              | 222    | 211    |
|                |                         | 1       | 311900                        | 225200 | 414900 | 317              | 317    | 300    |
|                |                         | 10      | 837                           | 820    | 883    | 907              | 836    | 886    |
| Recombinant    | 0                       | 0       | 213100                        | 184100 | 188500 | 227              | 227    | 190    |
|                |                         | 1       | 358                           | 326    | 307    | 350              | 297    | 318    |
|                |                         | 10      | 782                           | 763    | 770    | 808              | 798    | 832    |
|                | 0.03                    | 0       | 170000                        | 168100 | 206100 | 207              | 263    | 231    |
|                |                         | 1       | 366500                        | 232400 | 220500 | 308              | 331    | 327    |
|                |                         | 10      | 818                           | 796    | 797    | 748              | 753    | 811    |
|                | 0.3                     | 0       | 164000                        | 125000 | 244700 | 213              | 217    | 225    |
|                |                         | 1       | 340100                        | 218900 | 330800 | 387              | 342    | 345    |
|                |                         | 10      | 322400                        | 196200 | 250300 | 812              | 866    | 806    |
|                | 3.3                     | 0       | 172800                        | 104500 | 231100 | 247              | 243    | 243    |
|                |                         | 1       | 174900                        | 224800 | 158200 | 353              | 345    | 361    |
|                |                         | 10      | 91620                         | 60430  | 80840  | 872              | 841    | 831    |

<sup>1</sup> CFU per well for *S. aureus* strain ATCC 12600 was measured by colony counting and as an average of triplicate plates. The native protein A dataset had 83 CFU/well, while the recombinant protein A dataset had 105 CFU/well.

**Table S7.** A Modified Phage Cocktail Allows Detection of *S. aureus* in the Presence of Serum: RLU and CFU Values for Figure 5

| Sample Type        | ATCC Strain ID | CFU/well <sup>1</sup> | Signal (RLU) in 1% Serum |        |        |                                         |         |         |
|--------------------|----------------|-----------------------|--------------------------|--------|--------|-----------------------------------------|---------|---------|
|                    |                |                       | Phage Cocktail           |        |        | Phage Cocktail + Protein A <sup>2</sup> |         |         |
|                    |                |                       | Well 1                   | Well 2 | Well 3 | Well 1                                  | Well 2  | Well 3  |
| MSSA               | 6538           | 32                    | 53080                    | 242300 | 273400 | 277100                                  | 455100  | 502600  |
|                    | 12600          | 109                   | 395                      | 388    | 386    | 407900                                  | 250500  | 399800  |
|                    | 14775          | 94                    | 405                      | 370    | 503    | 2089000                                 | 2293000 | 1904000 |
|                    | 25923          | 59                    | 422                      | 3449   | 1577   | 779800                                  | 667800  | 230900  |
|                    | 29213          | 54                    | 1056                     | 825    | 516    | 10630                                   | 11400   | 8814    |
| MRSA               | 33592          | 154                   | 276                      | 531    | 641    | 6333                                    | 6493    | 7594    |
|                    | BAA-1683       | 77                    | 2102                     | 2602   | 1260   | 140900                                  | 103800  | 120000  |
|                    | BAA-1707       | 96                    | 1725                     | 2740   | 1775   | 644800                                  | 711000  | 702200  |
|                    | BAA-1717       | 108                   | 401                      | 286    | 261    | 439100                                  | 261300  | 744800  |
|                    | BAA-1720       | 105                   | 5433                     | 6945   | 27040  | 189100                                  | 420100  | 259700  |
|                    | BAA-1747       | 79                    | 760                      | 543    | 758    | 29660                                   | 12670   | 16420   |
|                    | BAA-1754       | 109                   | 414800                   | 655800 | 264000 | 661400                                  | 1966000 | 1071000 |
|                    | BAA-1761       | 101                   | 270                      | 235    | 311    | 74570                                   | 173500  | 115700  |
|                    | BAA-1763       | 54                    | 277                      | 345    | 257    | 3229                                    | 7846    | 7458    |
|                    | BAA-1764       | 89                    | 913                      | 961    | 841    | 367000                                  | 411700  | 514400  |
|                    | BAA-1766       | 78                    | 788200                   | 884500 | 650500 | 423900                                  | 797200  | 427000  |
|                    | BAA-1768       | 55                    | 3921                     | 9697   | 621    | 311600                                  | 1247000 | 396500  |
|                    | BAA-2094       | 93                    | 10490                    | 6722   | 2178   | 1467000                                 | 1544000 | 924300  |
|                    | BAA-2313       | 90                    | 36660                    | 83060  | 160100 | 674700                                  | 262100  | 1664000 |
|                    | BAA-41         | 98                    | 495                      | 261    | 275    | 149000                                  | 649700  | 95200   |
|                    | BAA-42         | 44                    | 577                      | 661    | 485    | 12840                                   | 12380   | 9816    |
|                    | BAA-44         | 122                   | 20240                    | 31810  | 44600  | 34450                                   | 55170   | 54420   |
| Media <sup>3</sup> | N/A            | N/A                   | 415                      | 381    | 393    | 398                                     | 450     | 356     |
|                    |                |                       | 261                      | 253    | 265    | 277                                     | 248     | 248     |

<sup>1</sup> CFU per well for each *S. aureus* strain was measured by colony counting and is the average of duplicate plates.

<sup>2</sup> Recombinant protein A at 0.3 mg/mL in the well during infection.

<sup>3</sup> Two sets of triplicate media background wells were run. One with the MSSA strains (top) and one with the MRSA strains (bottom).
